# Supplementary material for: Multicomponent Nanoparticles Synergistic One-Dimensional Nanofibers as Heterostructure Absorbers for Tunable and Efficient Microwave Absorption
Source: PubMed Central journal article supplement (PMC9755410; doi:10.1007/s40820-022-00986-3), 2022-12-15
Supplement: 40820_2022_986_MOESM1_ESM.pdf [file 40820_2022_986_MOESM1_ESM.pdf]

Supporting Information for

## Multicomponent Nanoparticles Synergistic One-Dimensional Nanofibers as Heterostructure Absorbers for Tunable and Efficient Microwave Absorption

Chenxi Wang<sup>1, #</sup>, Yue Liu<sup>1, #</sup>, Zirui Jia<sup>2, 3, #, \*</sup>, Wanru Zhao<sup>1</sup>, Guanglei Wu<sup>1, \*</sup>

<sup>1</sup>Institute of Materials for Energy and Environment, State Key Laboratory of Bio-fibers and Eco-textiles, College of Materials Science and Engineering, Qingdao University, Qingdao 266071, P. R. China

<sup>2</sup>College of Chemistry and Chemical Engineering, Qingdao University, Shandong, Qingdao 266071, P. R. China

<sup>3</sup>Weihai Innovation Institute, Qingdao University, Shandong, Qingdao 264200, P. R. China

#Chenxi Wang, Yue Liu, and Zirui Jia contributed equally to this work.

\*Corresponding authors. E-mail: [jjazirui@qdu.edu.cn](mailto:jjazirui@qdu.edu.cn) (Z. Jia); [wuguanglei@qdu.edu.cn](mailto:wuguanglei@qdu.edu.cn) or [wuguanglei@mail.xjtu.edu.cn](mailto:wuguanglei@mail.xjtu.edu.cn) (G. Wu)

### Supplementary Figures and Table

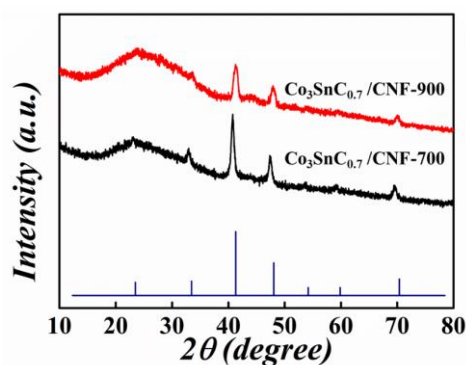

**Fig. S1** XRD patterns of samples  $\text{Co}_3\text{SnC}_{0.7}/\text{CNF-700}$  and  $\text{Co}_3\text{SnC}_{0.7}/\text{CNF-900}$

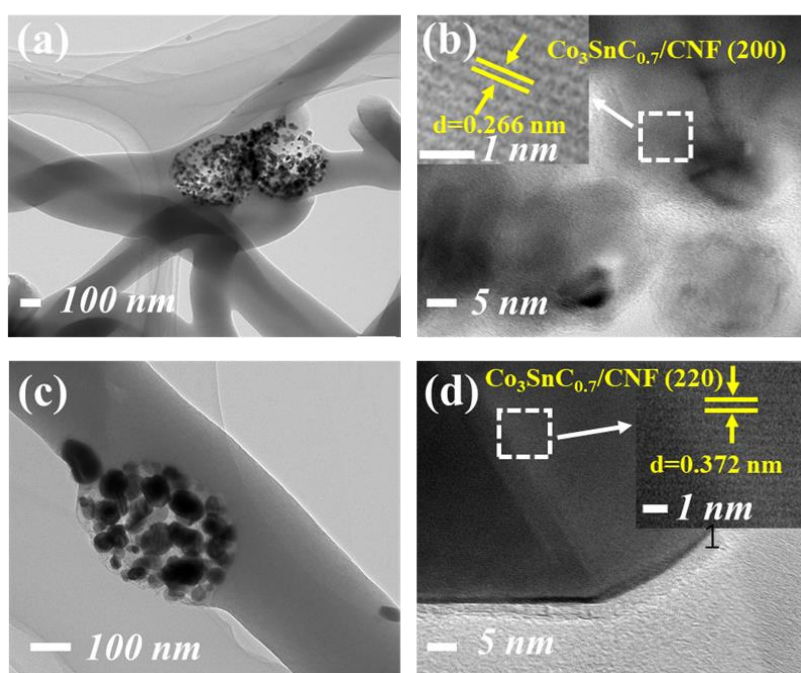

**Fig. S2** The TEM images of  $\text{Co}_3\text{SnC}_{0.7}/\text{CNF-700}$  (a, b) and  $\text{Co}_3\text{SnC}_{0.7}/\text{CNF-900}$  (c, d)

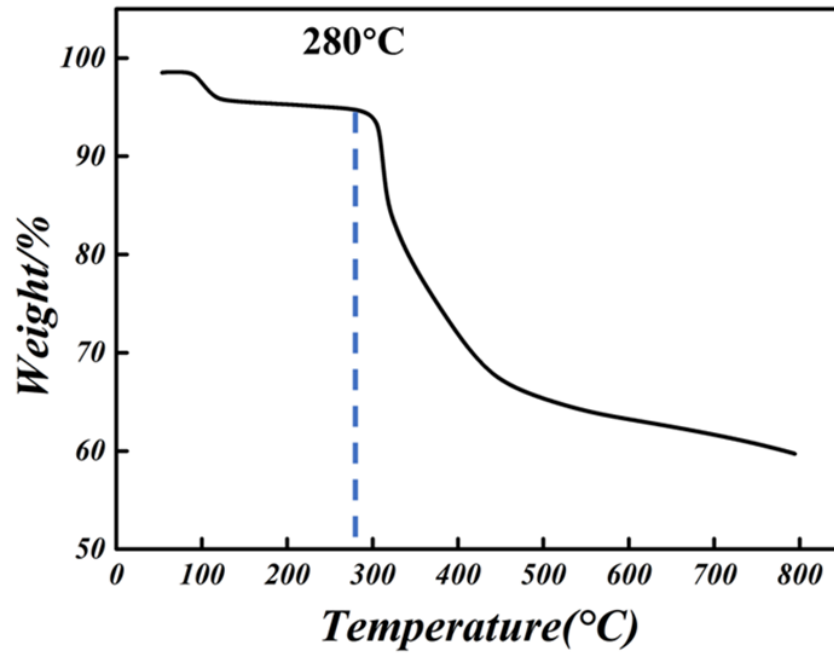

**Fig. S3** Thermogravimetric curve of samples  $\text{CoSnO}_3/\text{PANF}$

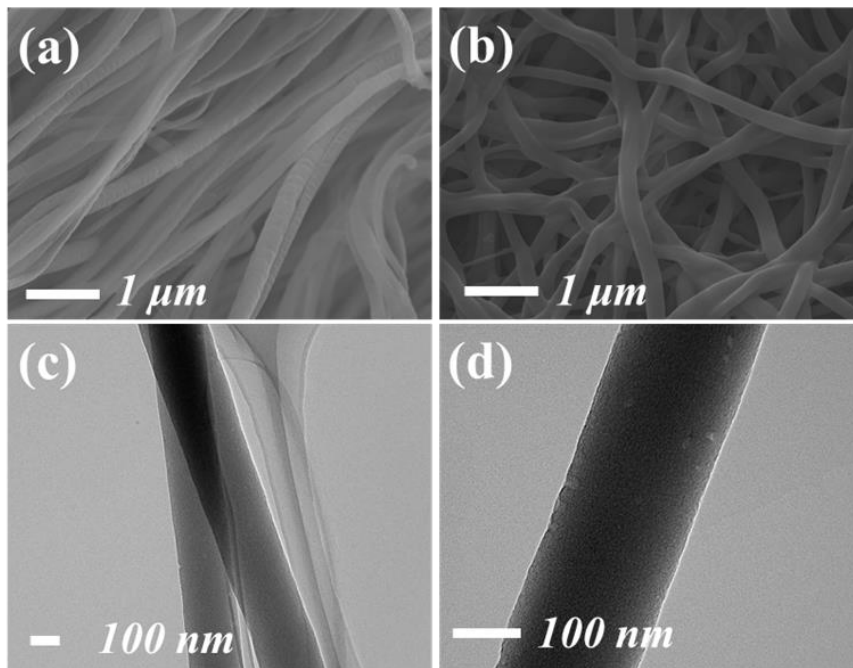

**Fig. S4** SEM images of PANF (a), CNF (b); The TEM images of CNF (c, d)

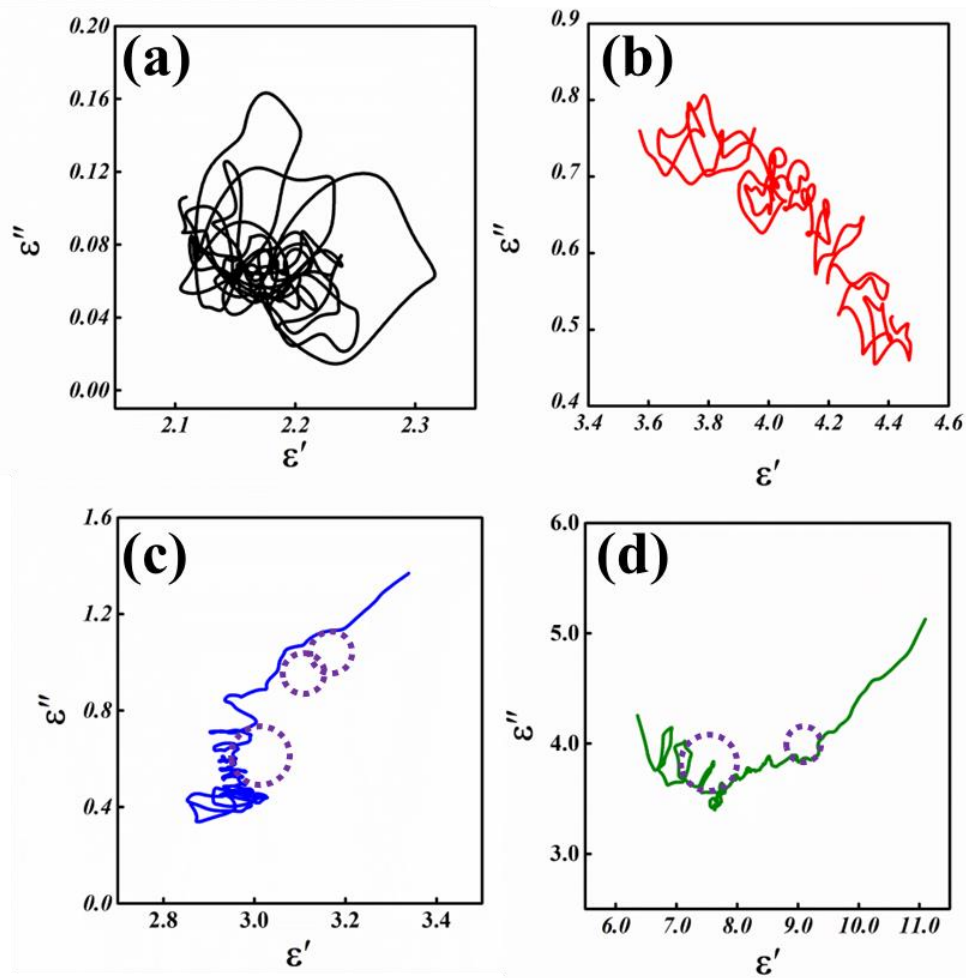

**Fig. S5** The Cole-Cole curves of  $\text{CoSnO}_3/\text{PANF}$  (a), CNF (b),  $\text{Co}_3\text{SnC}_{0.7}/\text{CNF-700}$  (c) and  $\text{Co}_3\text{SnC}_{0.7}/\text{CNF-900}$  (d)

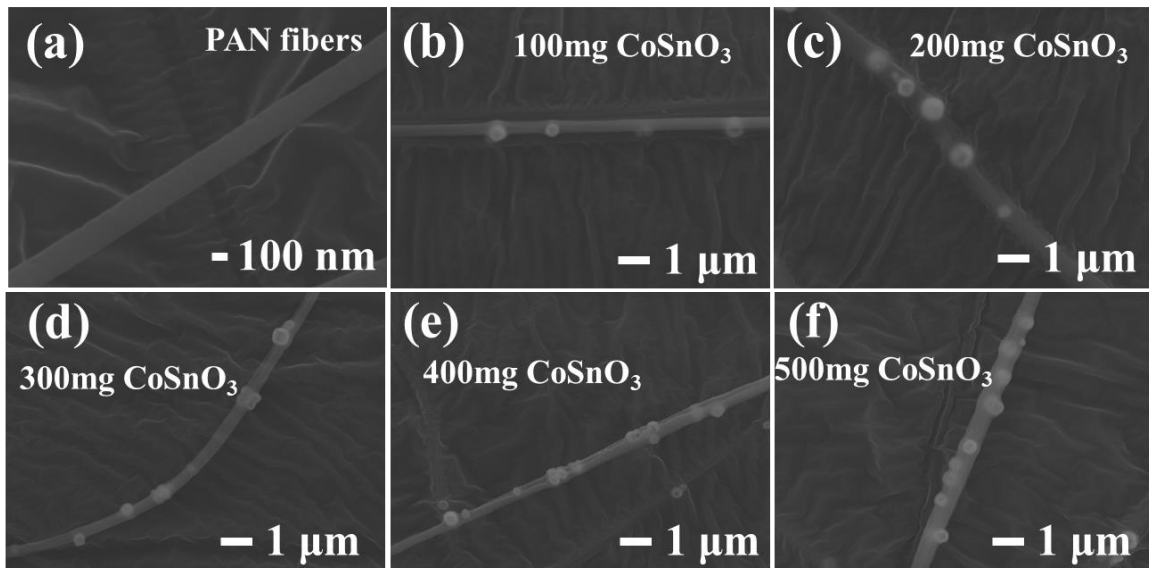

**Fig. S6** The SEM images of  $\text{CoSnO}_3/\text{PANF}$  with 0 mg (a), 100 mg (b), 200 mg (c), 300 mg (d), 400 mg (e) and 500 mg (f)  $\text{CoSnO}_3$  content

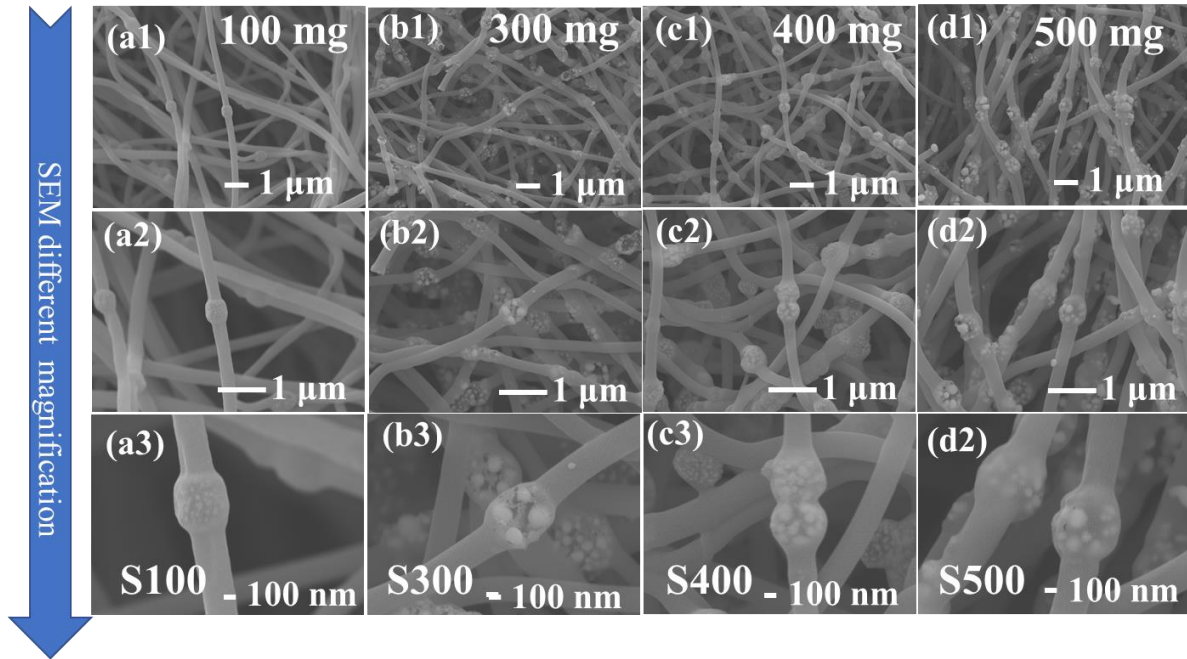

**Fig. S7** The different magnifications SEM images of S100 (a1-3), S300 (b1-3), S400 mg (c1-3) and S500 (d1-3)

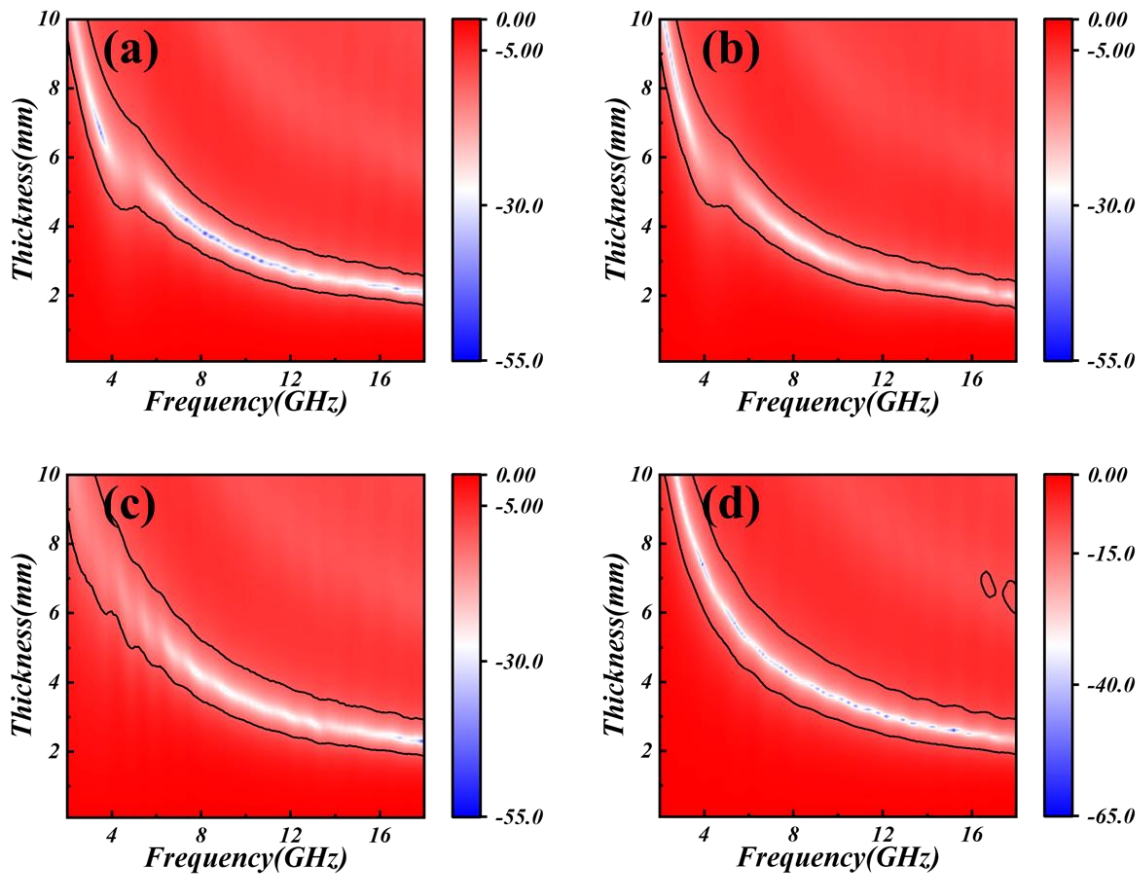

**Fig. S8** 2D effective bandwidth of S100 (a), S100 (b), S100 (c), S100 (d)

**Table S1** Electromagnetic wave absorption performance of one-dimensional carbon matrix composites absorbers reported in previous studies and this work

| <b>EMW absorbers</b>                        | <b>RL/dB</b> | <b><math>t_m</math>(mm)</b> | <b><math>f_E</math>/GHz</b> | <b>Refs.</b> |
|---------------------------------------------|--------------|-----------------------------|-----------------------------|--------------|
| CF@1T/2H -MoS <sub>2</sub>                  | -43          | 2.7                         | 8.75 (3.5 mm)               | [6]          |
| CF@MXene@MoS <sub>2</sub>                   | -61.51       | 3.5                         | 7.6 (2.1 mm)                | [16]         |
| MMC                                         | -51.6        | 1.6                         | 4.6                         | [17]         |
| CNT/SiC <sub>f</sub>                        | -62.5        | 4                           | 8.8 GHz                     | [23]         |
| HCF@CZ-CNTs                                 | -53.5        | 2.9                         | 8.02 (2 mm)                 | [26]         |
| Co-LDHs/SCFs                                | -40.4        | 2.0                         | 6.5 (2.1 mm)                | [27]         |
| CN-ABF                                      | -75.19       | 2.66                        | 4.56 (2.66 mm)              | [29]         |
| Co@NCNTs/CF                                 | -57.8        | 2                           | 4.5 (2 mm)                  | [30]         |
| SiC@C@PPy                                   | -59.32       | 3.01                        | 8.4 (2.78 mm)               | [45]         |
| ZrO <sub>2</sub> -SiC/SiO <sub>2</sub>      | -18.1        | 10                          | 5.52                        | [48]         |
| CNTs/CF                                     | -44.46       | 3                           | 14.24 (0.5-6.0 mm)          | [56]         |
| Co <sub>3</sub> SnC <sub>0.7</sub> /CNF-700 | -21.6        | 7.2                         | 6.56 (8.0 mm)               | This work    |
| Co <sub>3</sub> SnC <sub>0.7</sub> /CNF-800 | -51.7        | 2.3                         | 7.44 (2.5 mm)               | This work    |
| Co <sub>3</sub> SnC <sub>0.7</sub> /CNF-900 | -21.7        | 2.0                         | 5.92 (2.2 mm)               | This work    |
| S400                                        | -47.3        | 2.3                         | 8.08 (2.6 mm)               | This work    |
| S500                                        | -62.0        | 2.6                         | 8.0 (2.9 mm)                | This work    |
